# Supplementary material
Source: Springer Nature journal article supplement (https://www.springermedizin.de/resource/supplementary/12888_2005_154_MOESM4_ESM.pdf/9482016)

**a.**

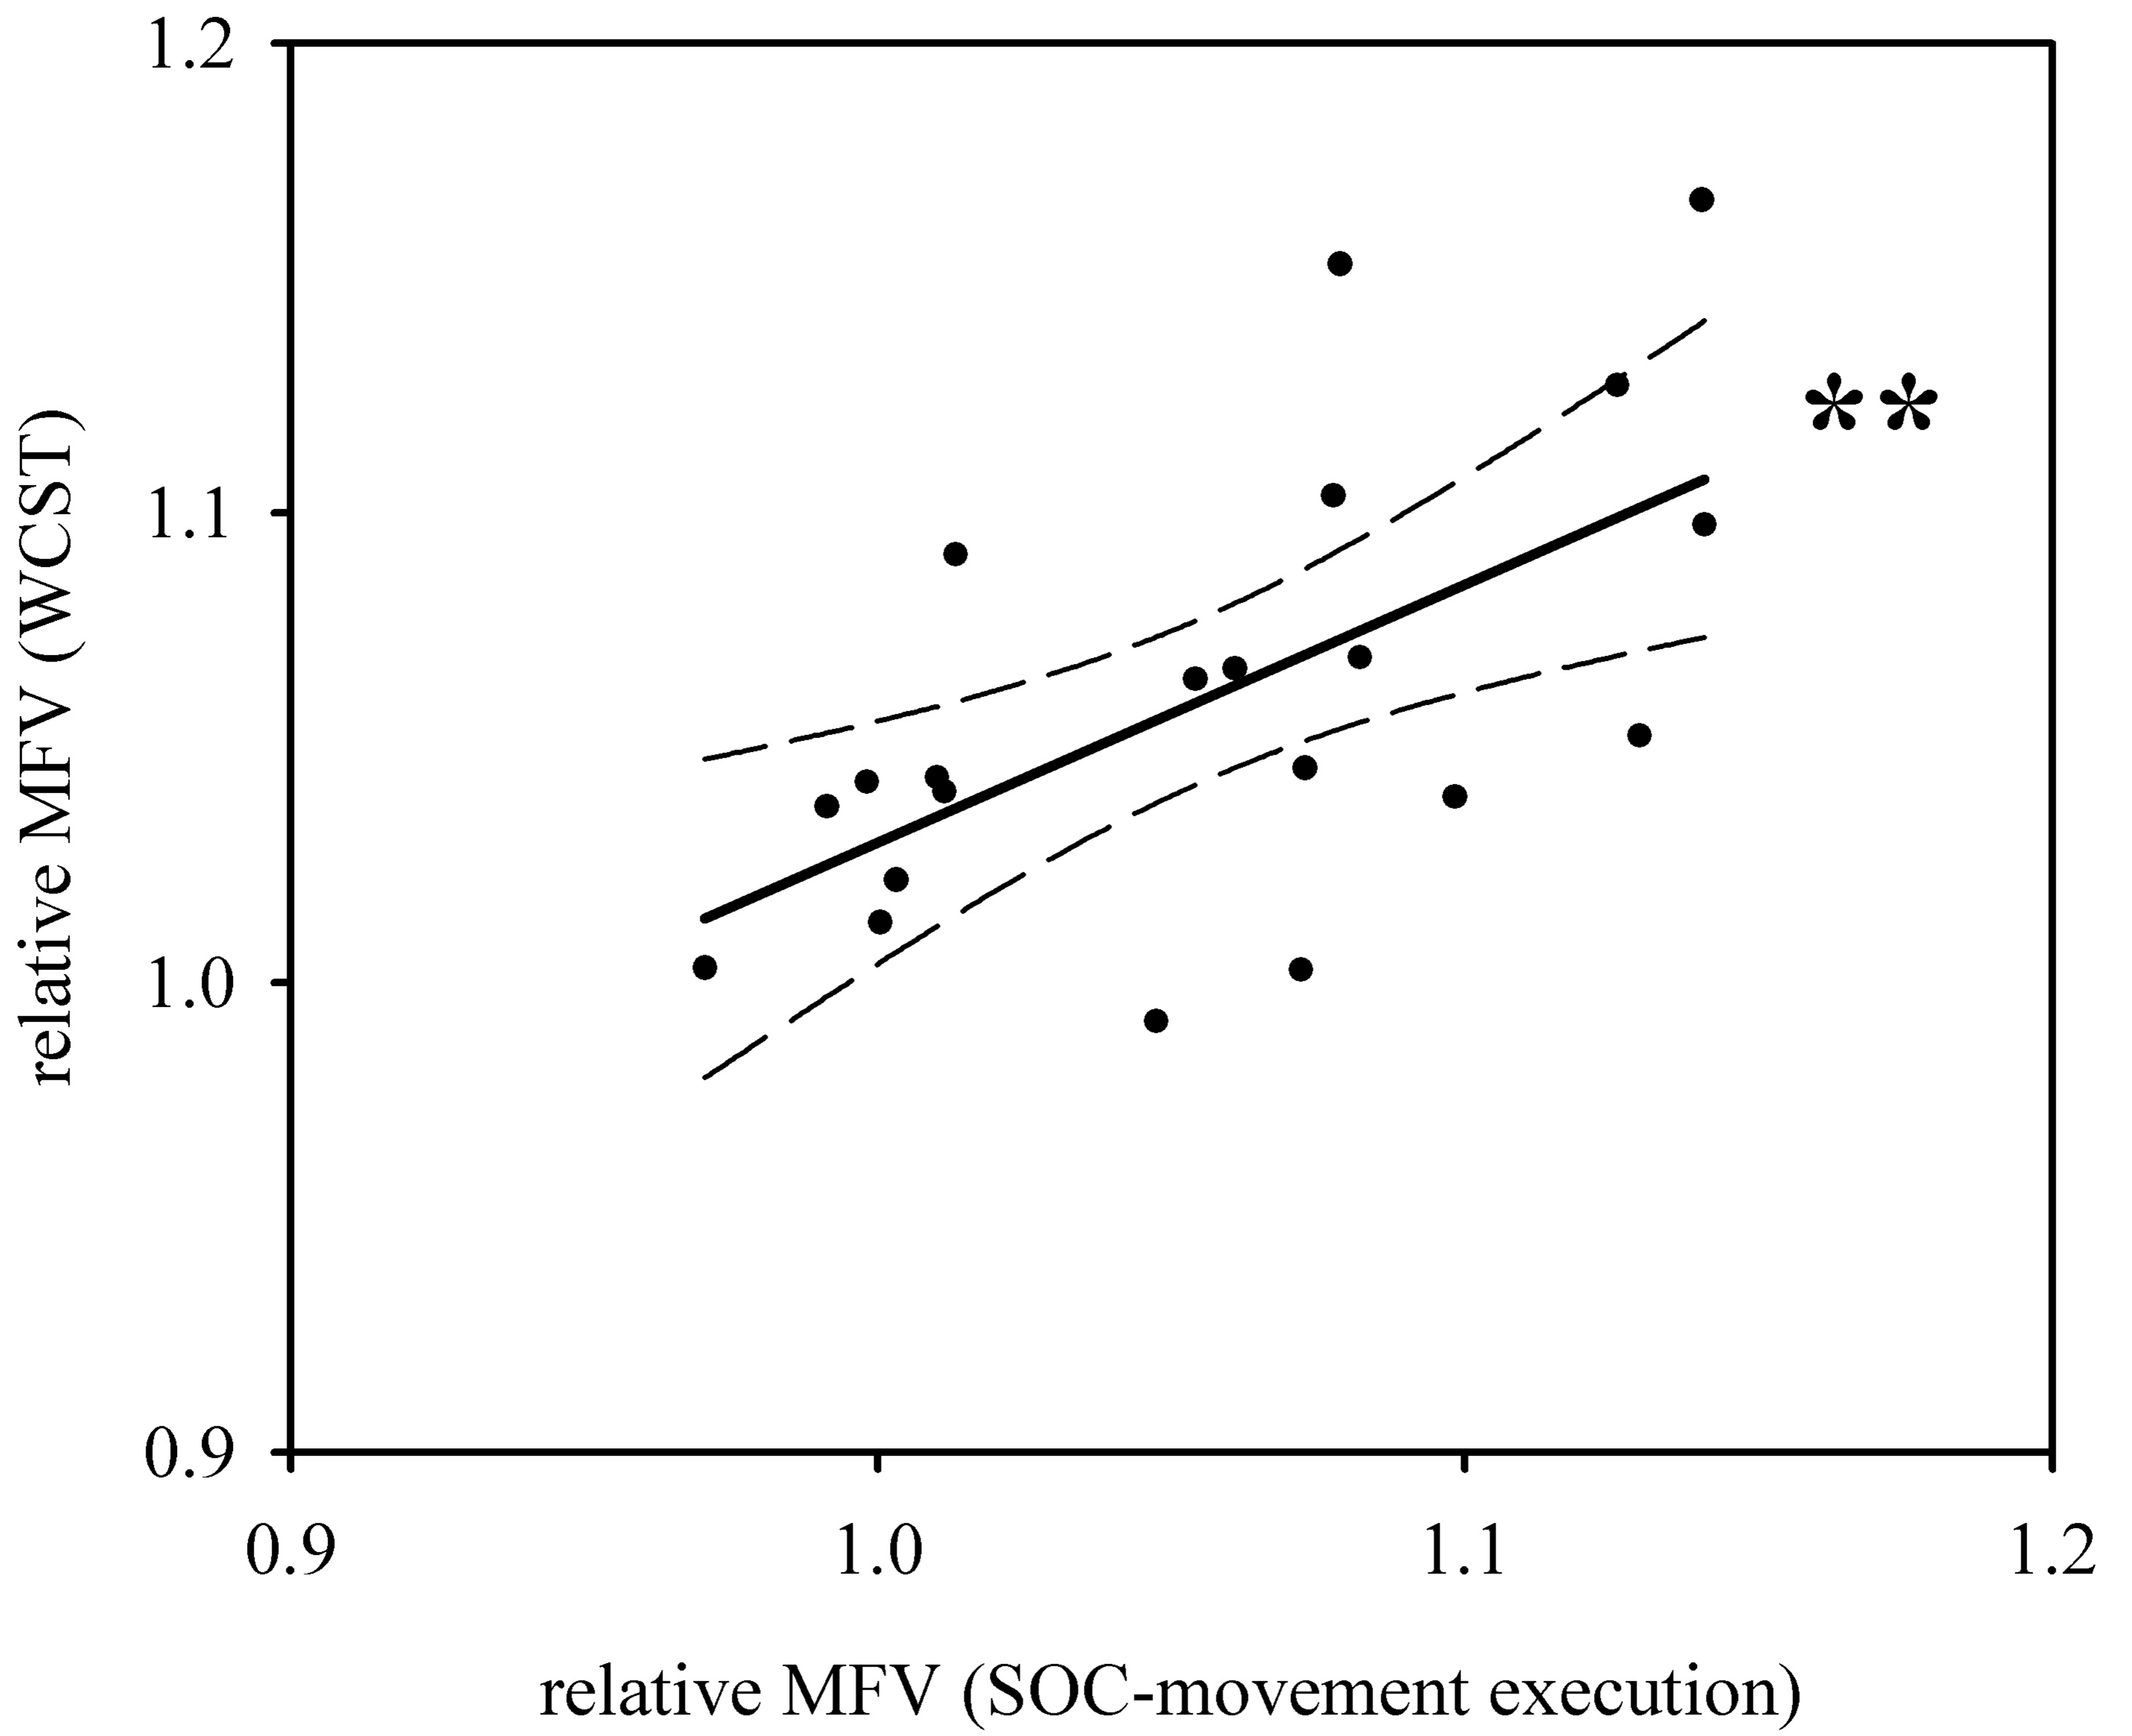

**b.**

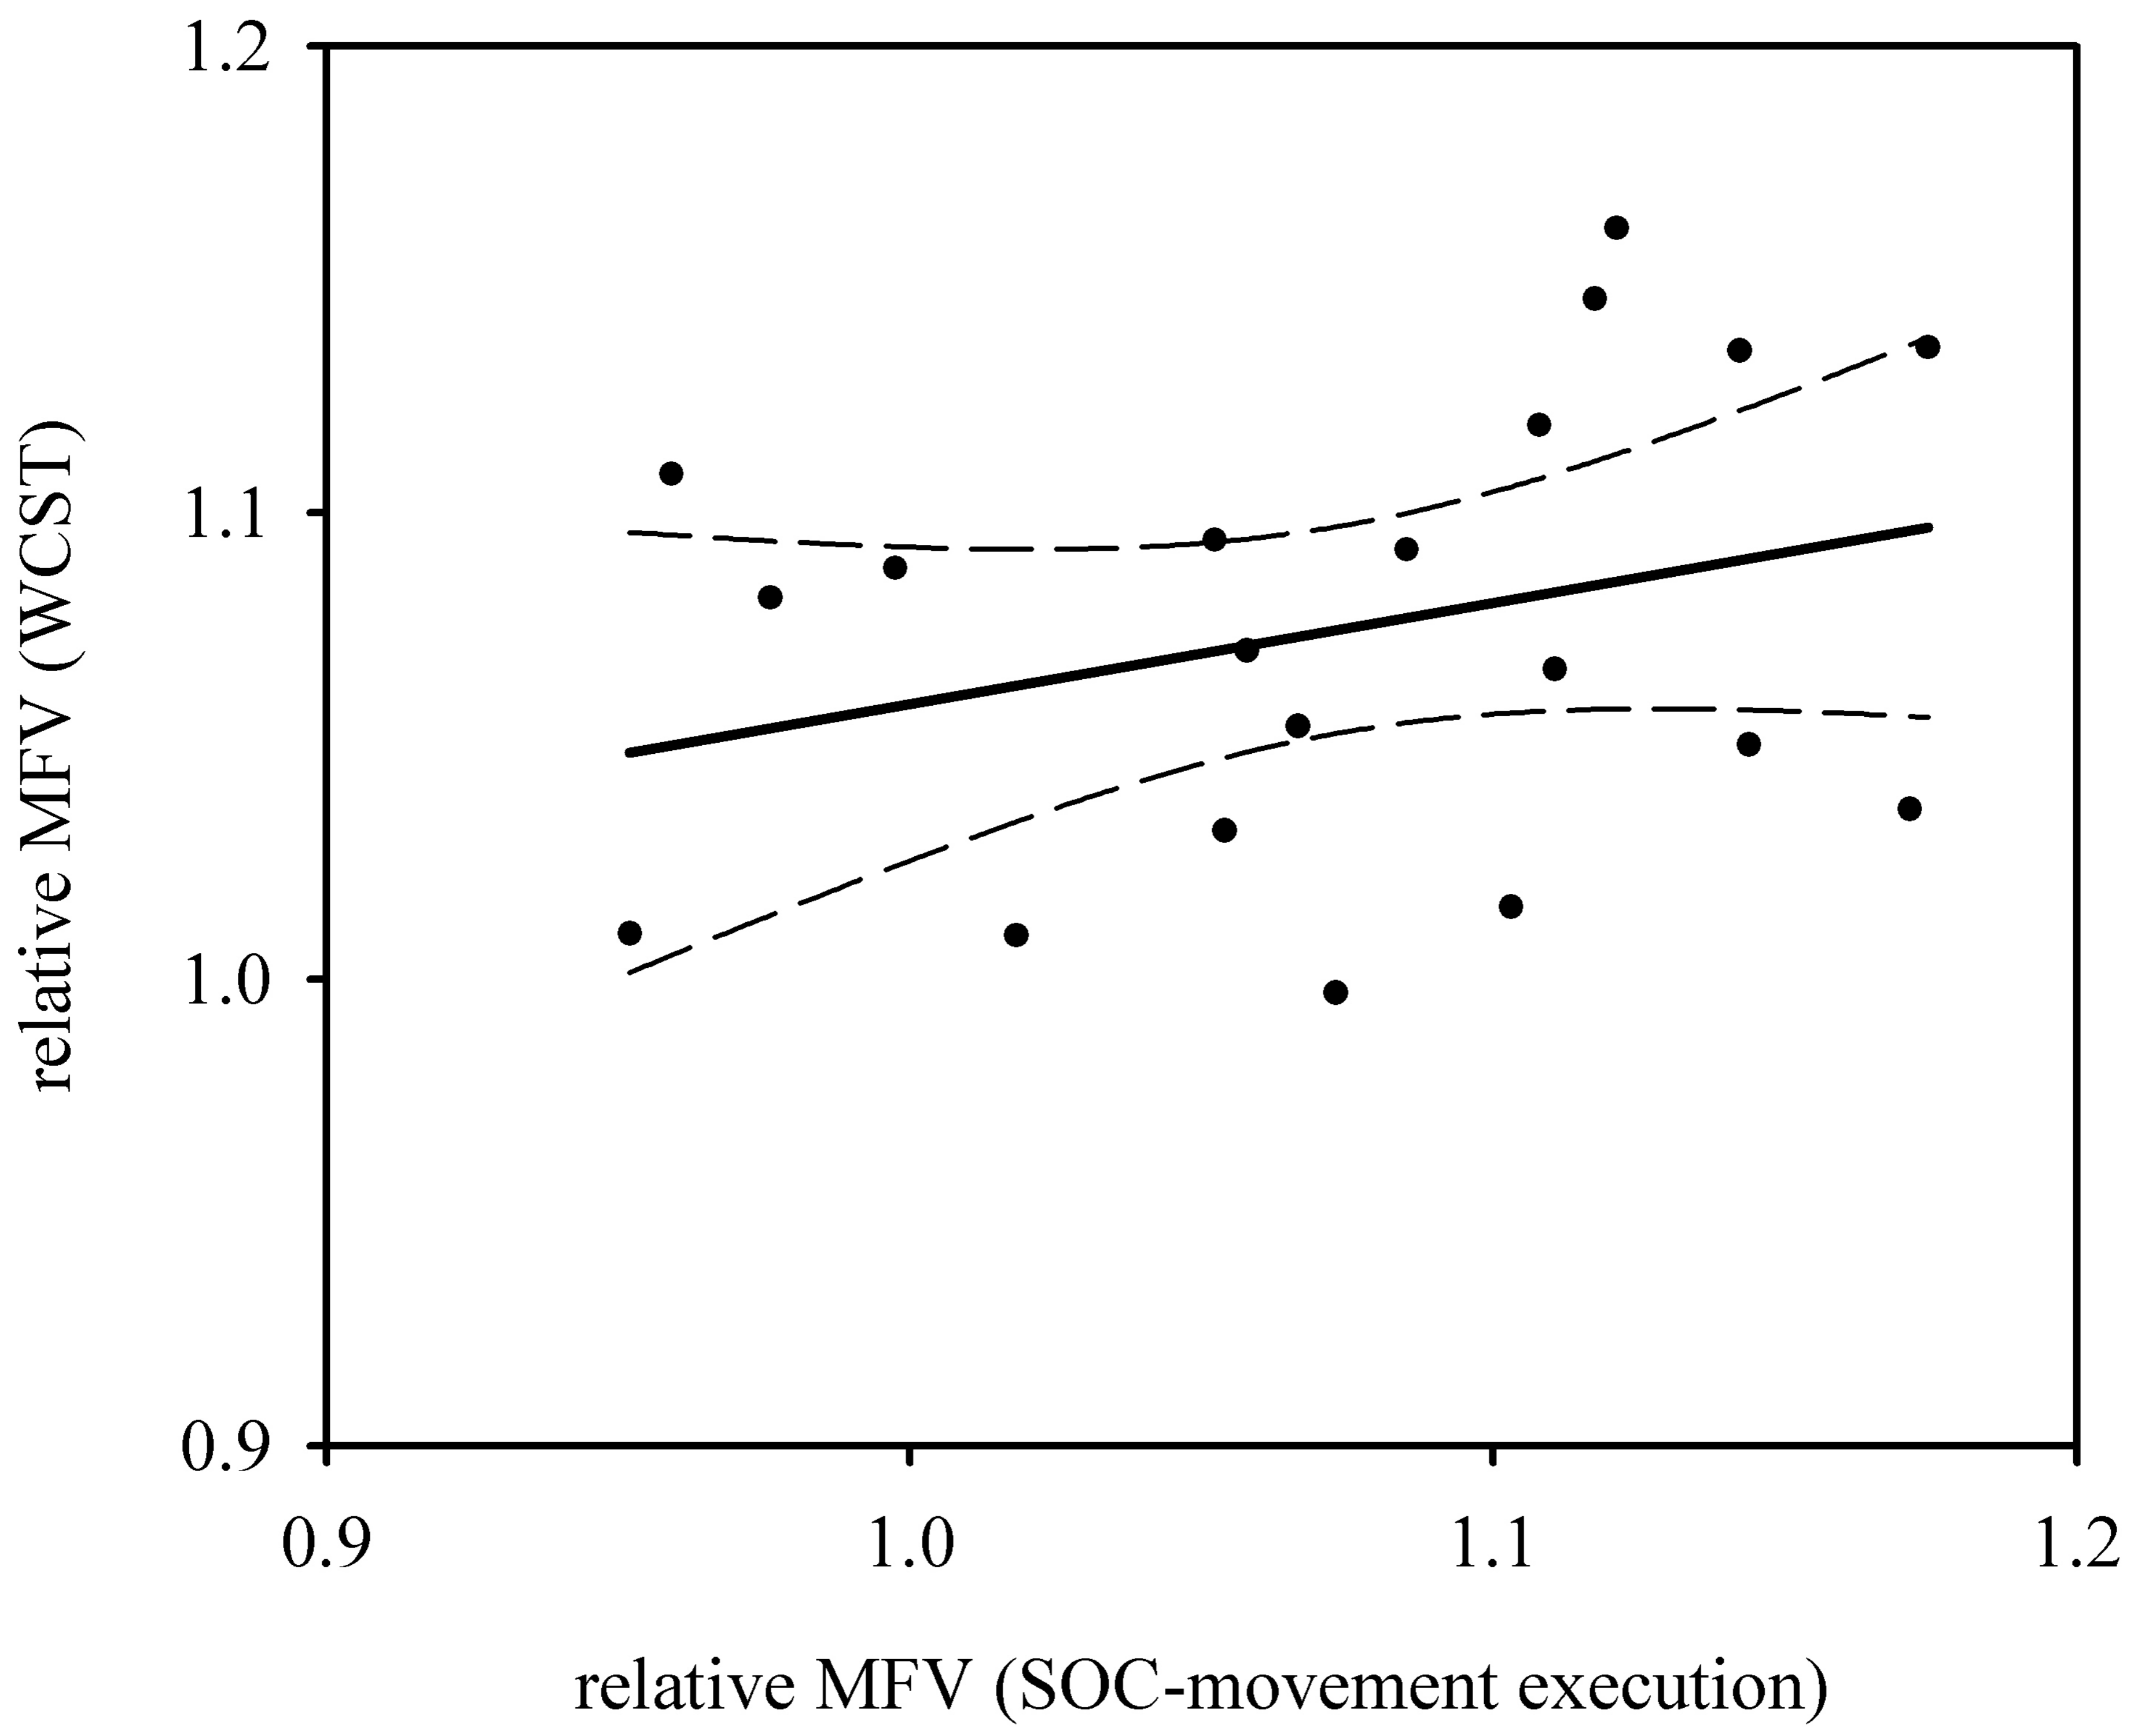

Supplement: MOESM4 [file 9482016]
